# Supplementary material
Source: MDPI journal article supplement (https://www.mdpi.com/2073-4441/13/14/1988)
Supplement: s1 [file s1]

Archive with 1 entries (1 files):
- water-1273473-SI.pdf
